# Supplementary material for: Focal Traumatic Brain Injury Impairs the Integrity of the Basement Membrane of Hindlimb Muscle Fibers Revealed by Extracellular Matrix Immunoreactivity
Source: MDPI journal article supplement (doi:10.3390/life14050543), 2024-04-24
Supplement: s1 [file s1]

Laminin

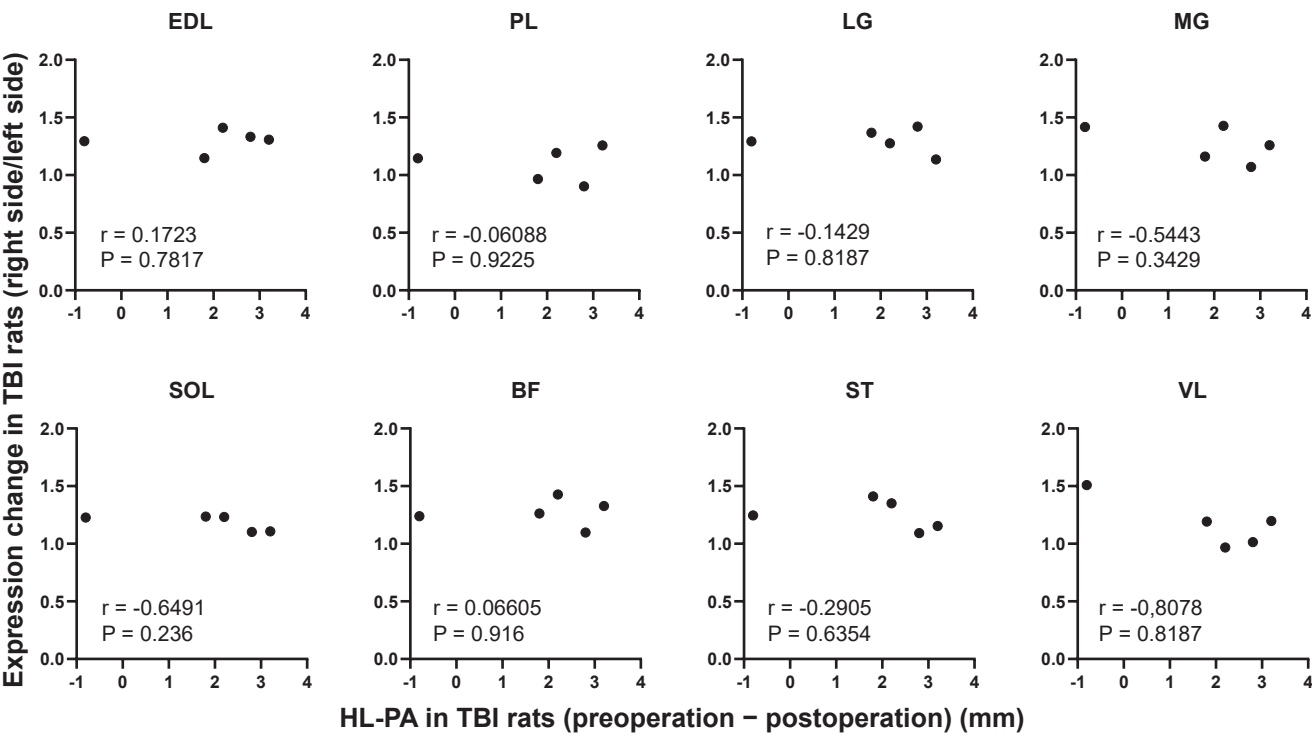

Collagen IV

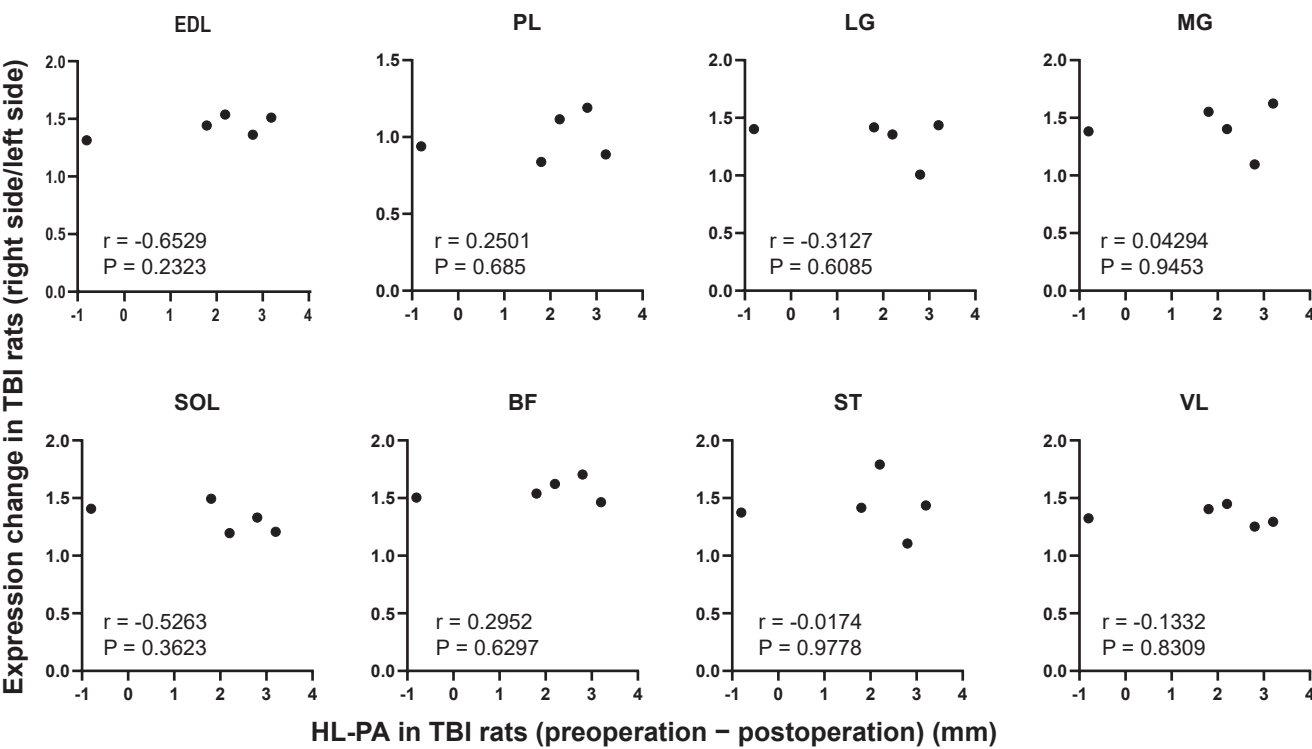

**Supplementary Figure S1.** Correlation analyses between HL-PA and the expression changes of laminin or collagen IV in TBI rats show no significant correlations between the two parameters in any of the investigated hindlimb muscles ( $P > 0.05$ ).
